# Supplementary material
Source: MDPI journal article supplement (https://www.mdpi.com/2073-4395/14/5/1073)
Supplement: s1 [file s1]

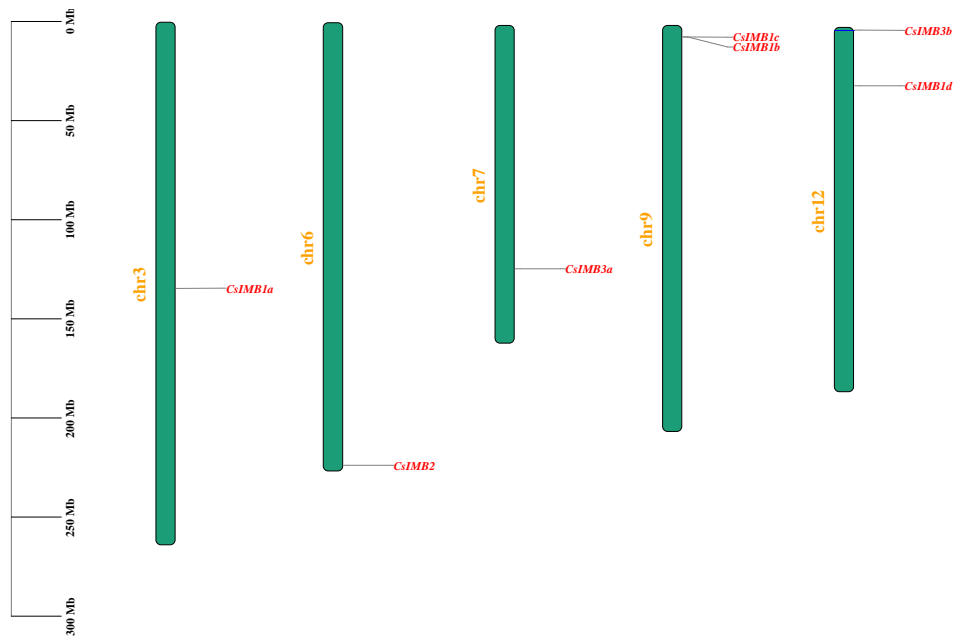

**Figure S1.** The chromosomal location of *CsIMB* genes.

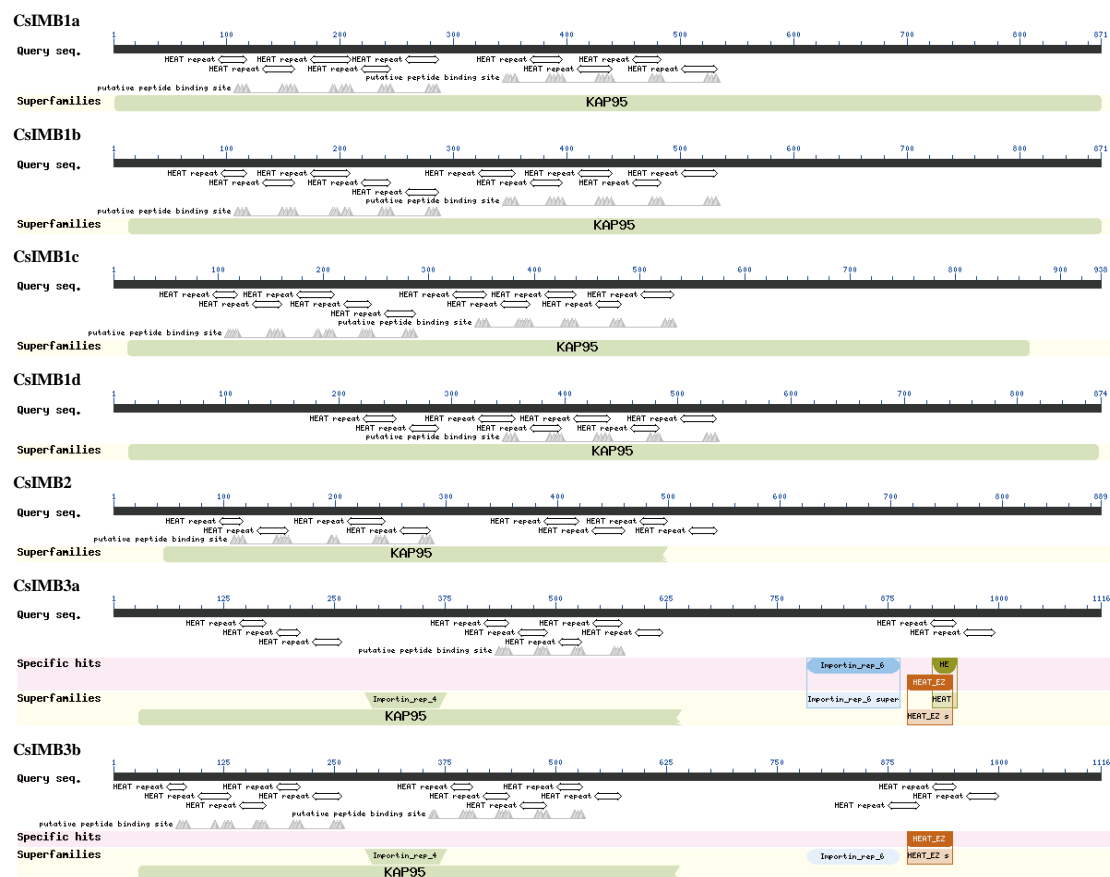

**Figure S2.** Conserved domain of *CsIMB* proteins. Each *CsIMB* contains a conserved structural domain for KAP95 and HEAT Repeats domains.

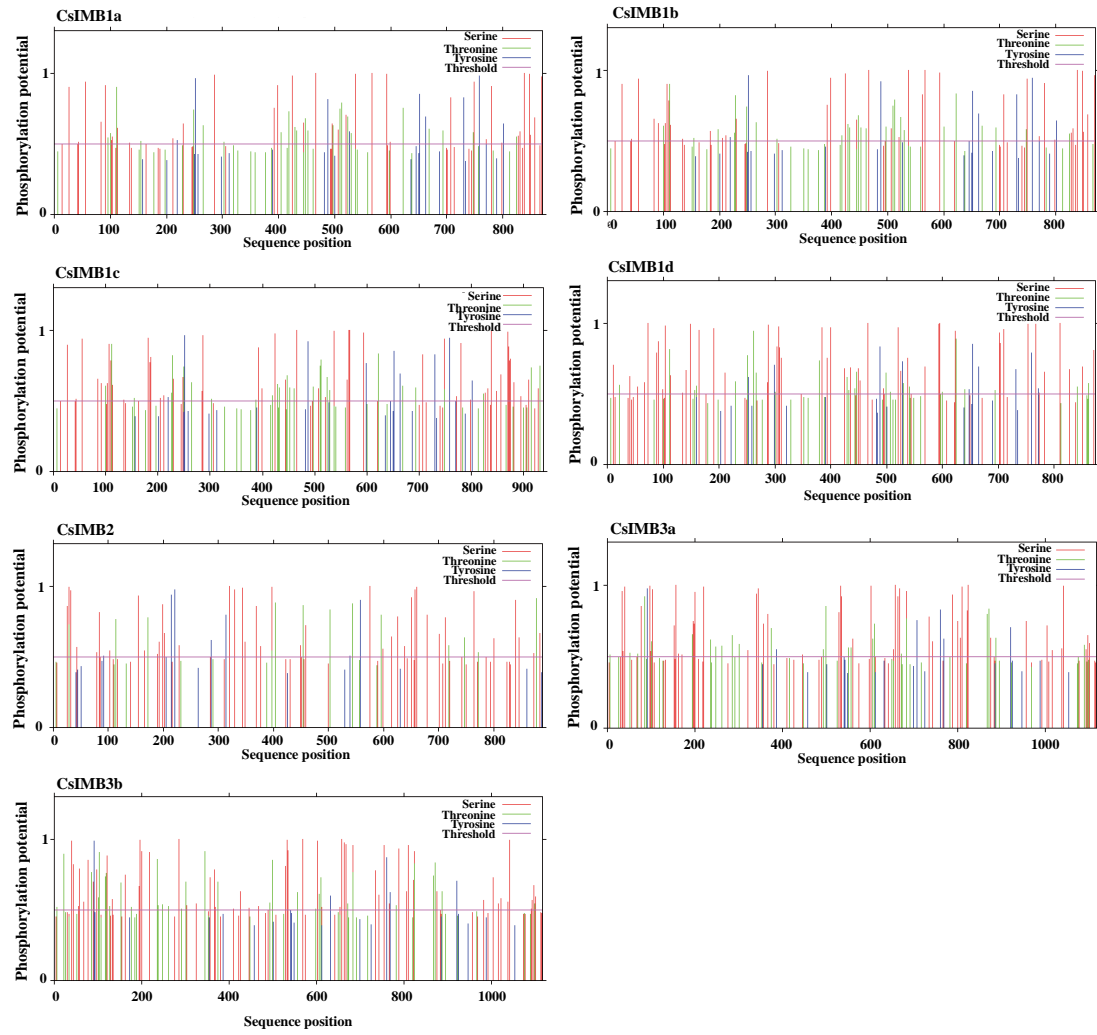

**Figure S3.** Phosphorylation site of *CsIMBs*. Vertical lines with different colors indicate that there are corresponding amino acid phosphorylation sites at the sequence position. The horizontal line indicates the score threshold.

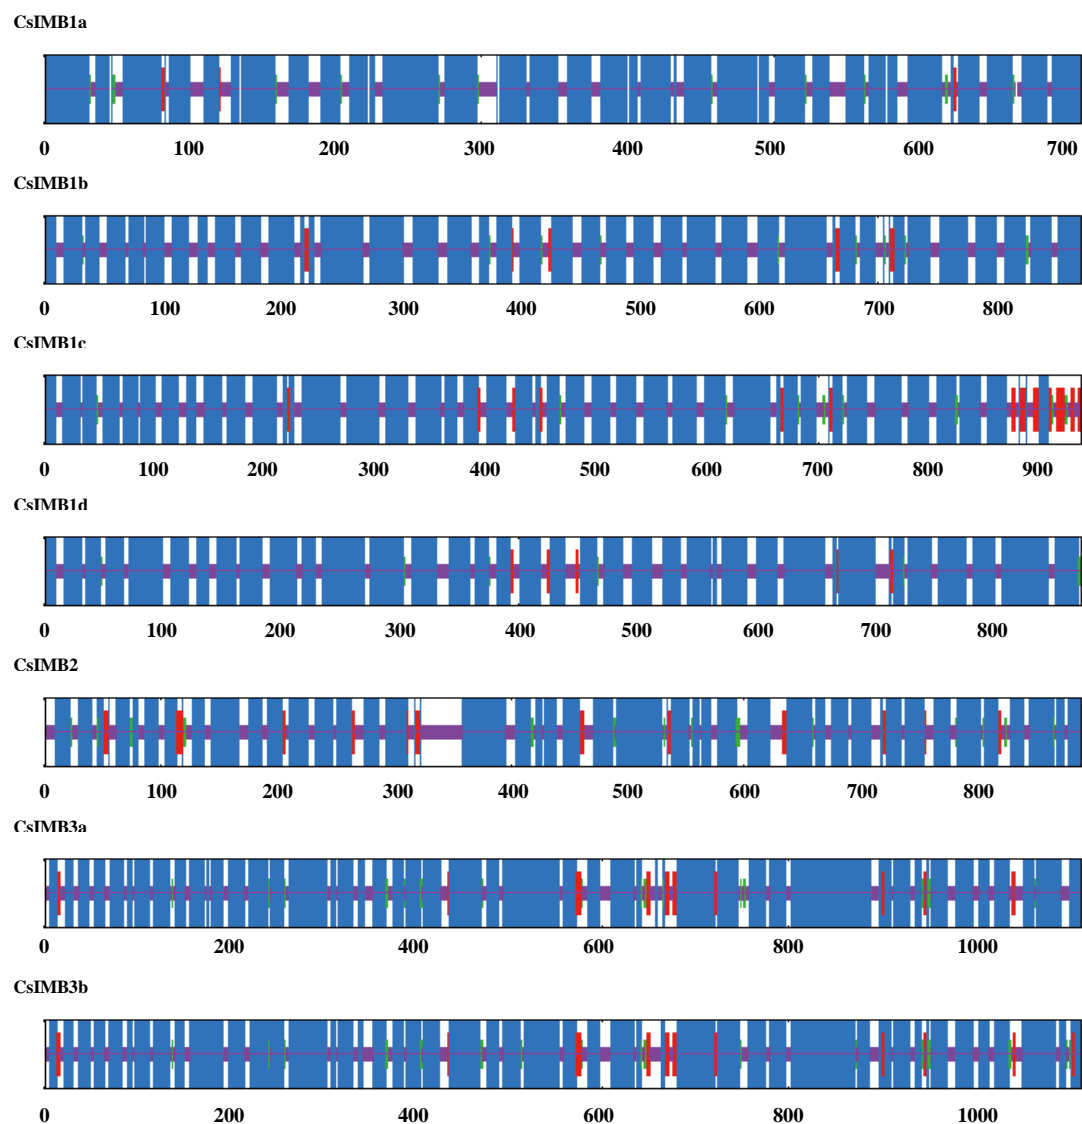

**Figure S4.** Secondary structure of *CsIMBs*. The blue part represents Alpha helix, the green part represents Beta turn, the red part represents Extended strand, and the purple part represents Random coil.

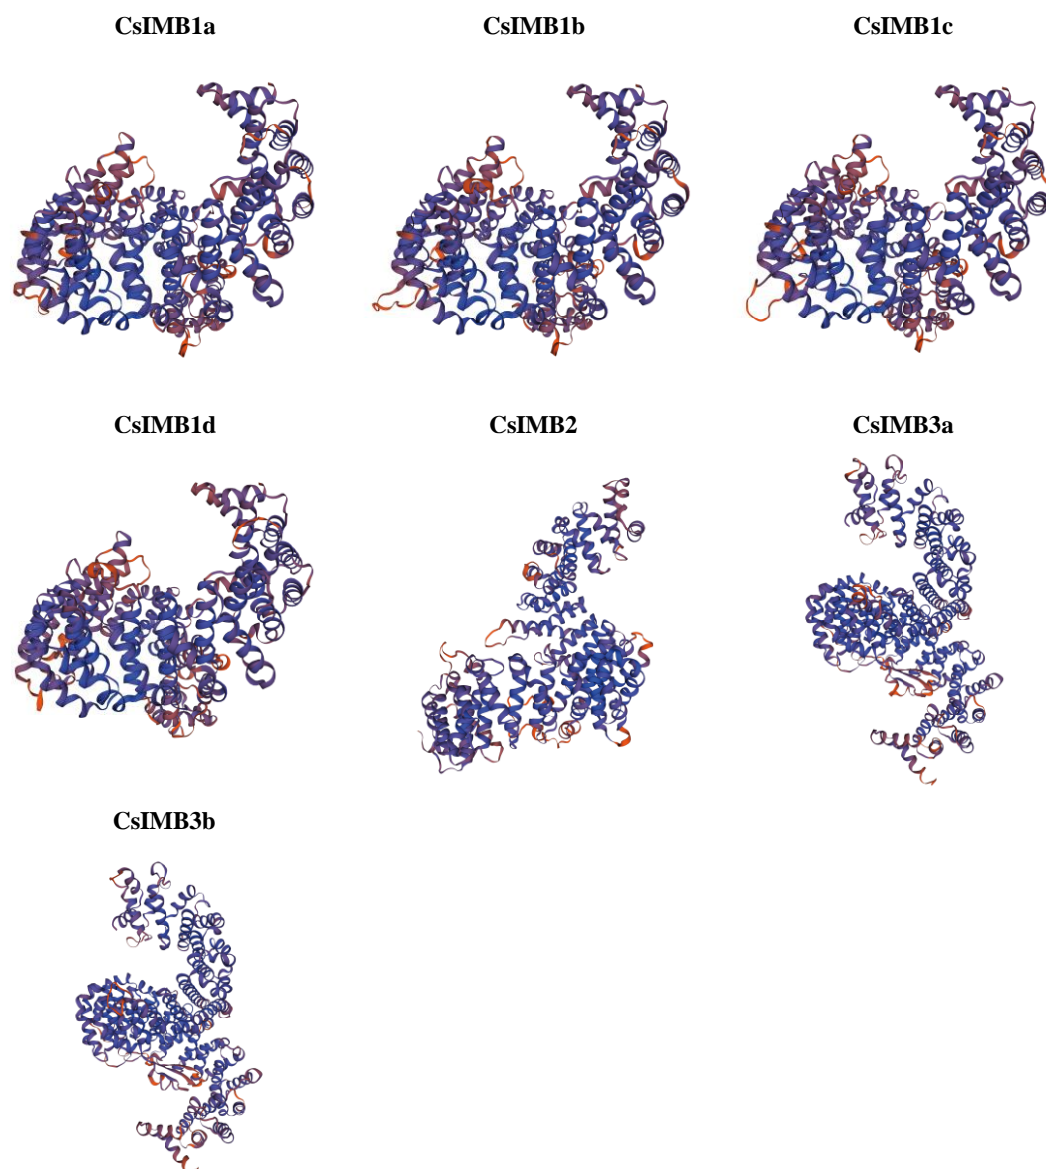

**Figure S5.** Tertiary structure of *CsIMBs*. The blue part represents Alpha helix, the orange part represents Beta turn.
